# Supplementary material for: MAF Amplification and Adjuvant Clodronate Outcomes in Early-Stage Breast Cancer in NSABP B-34 and Potential Impact on Clinical Practice
Source: PubMed Central journal article supplement (PMC8346694; doi:10.1093/jncics/pkab054), 2021-05-28
Supplement: pkab054_supplementary_data.pdf [file pkab054_supplementary_data.pdf]

## SUPPLEMENTARY MATERIALS

### Supplementary Tables

**Supplementary Table 1. Outcomes HR of the trial endpoints according to patients' subgroups and follow-up time**

| Endpoints                |               | 5 years                       | 7 years                       | median FU=109m                |
|--------------------------|---------------|-------------------------------|-------------------------------|-------------------------------|
| All B-34<br>N=3311       | OS            | HR= 0.81 (0.61, 1.09) p= 0.15 | HR= 0.86 (0.68, 1.10) p= 0.22 | HR= 0.90 (0.74, 1.10) p= 0.29 |
|                          | DFS           | HR= 0.85 (0.70, 1.03) p= 0.10 | HR= 0.92 (0.78, 1.09) p= 0.34 | HR= 0.97 (0.83, 1.12) p= 0.65 |
|                          | RFI           | HR= 0.81 (0.64, 1.02) p= 0.07 | HR= 0.89 (0.72, 1.09) p= 0.26 | HR= 0.92 (0.76, 1.11) p= 0.38 |
|                          | Bone mets     | HR= 0.83 (0.56, 1.24) p= 0.36 | HR= 0.77 (0.54, 1.10) p= 0.15 | HR= 0.82 (0.59, 1.12) p= 0.21 |
|                          | Non_Bone mets | HR= 0.67 (0.48, 0.93) p= 0.01 | HR= 0.74 (0.55, 1.00) p= 0.04 | HR= 0.72 (0.55, 0.96) p= 0.02 |
| MAF<br>Samples<br>N=2419 | OS            | HR= 0.74 (0.53, 1.04) p= 0.08 | HR= 0.83 (0.63, 1.09) p= 0.17 | HR= 0.83 (0.66, 1.04) p= 0.10 |
|                          | DFS           | HR= 0.81 (0.65, 1.02) p= 0.07 | HR= 0.89 (0.73, 1.08) p= 0.24 | HR= 0.96 (0.81, 1.14) p= 0.63 |
|                          | RFI           | HR= 0.79 (0.59, 1.04) p= 0.09 | HR= 0.89 (0.69, 1.14) p= 0.34 | HR= 0.92 (0.73, 1.15) p= 0.45 |
|                          | Bone Mets     | HR= 0.85 (0.54, 1.36) p= 0.49 | HR= 0.78 (0.52, 1.18) p= 0.24 | HR= 0.79 (0.55, 1.15) p= 0.22 |
|                          | Non_Bone mets | HR= 0.73 (0.50, 1.08) p= 0.11 | HR= 0.82 (0.58, 1.15) p= 0.25 | HR= 0.80 (0.58, 1.10) p= 0.16 |

**Supplementary Table 2. Endpoint events in patient subgroups**

| Events        | FULL B-34 (n= 3311) |                        |            | MAF evaluable (n=1883) |                       |            | MAF Negative (n=1515) |                       |            | MAF Positive (n=368) |                       |          |
|---------------|---------------------|------------------------|------------|------------------------|-----------------------|------------|-----------------------|-----------------------|------------|----------------------|-----------------------|----------|
|               | Placebo<br>(n=1656) | Clodronate<br>(n=1655) | Total      | Placebo<br>(n=947)     | Clodronate<br>(n=936) | Total      | Placebo<br>(n=766)    | Clodronate<br>(n=749) | Total      | Placebo<br>(n=181)   | Clodronate<br>(n=187) | Total    |
|               | N (%)               | N (%)                  | N (%)      | N (%)                  | N (%)                 | N (%)      | N (%)                 | N (%)                 | N (%)      | N (%)                | N (%)                 | N (%)    |
| DFS           | 355 (21.4)          | 347 (21.0)             | 702 (21.2) | 206 (21.8)             | 200 (21.4)            | 406 (21.6) | 158 (20.6)            | 150 (20.0)            | 308 (20.3) | 48 (26.5)            | 50 (26.7)             | 98 (6.5) |
| OS            | 204 (12.3)          | 184 (11.1)             | 388 (11.7) | 133 (14.0)             | 108 (11.5)            | 241 (12.8) | 98 (12.8)             | 75 (10.0)             | 173 (11.4) | 35 (19.3)            | 33 (17.6)             | 68 (4.5) |
| RFI           | 221 (13.3)          | 206 (12.4)             | 427 (12.9) | 123 (13.0)             | 113 (12.1)            | 236 (12.5) | 74 (9.7)              | 67 (8.9)              | 141 (9.3)  | 36 (19.9)            | 28 (15.0)             | 64 (4.2) |
| Bone Mets     | 85 (5.1)            | 70 (4.2)               | 155 (4.7)  | 51 (5.4)               | 37 (4.0)              | 88 (4.7)   | 34 (4.4)              | 31 (4.1)              | 65 (4.3)   | 16 (8.8)             | 6 (3.2)               | 22 (1.5) |
| Non-Bone Mets | 115 (6.9)           | 84 (5.1)               | 199 (6.0)  | 73 (7.7)               | 55 (5.9)              | 128 (6.8)  | 52 (6.8)              | 42 (5.6)              | 94 (6.2)   | 21 (11.6)            | 13 (7.0)              | 34 (2.2) |

## Supplementary Figures

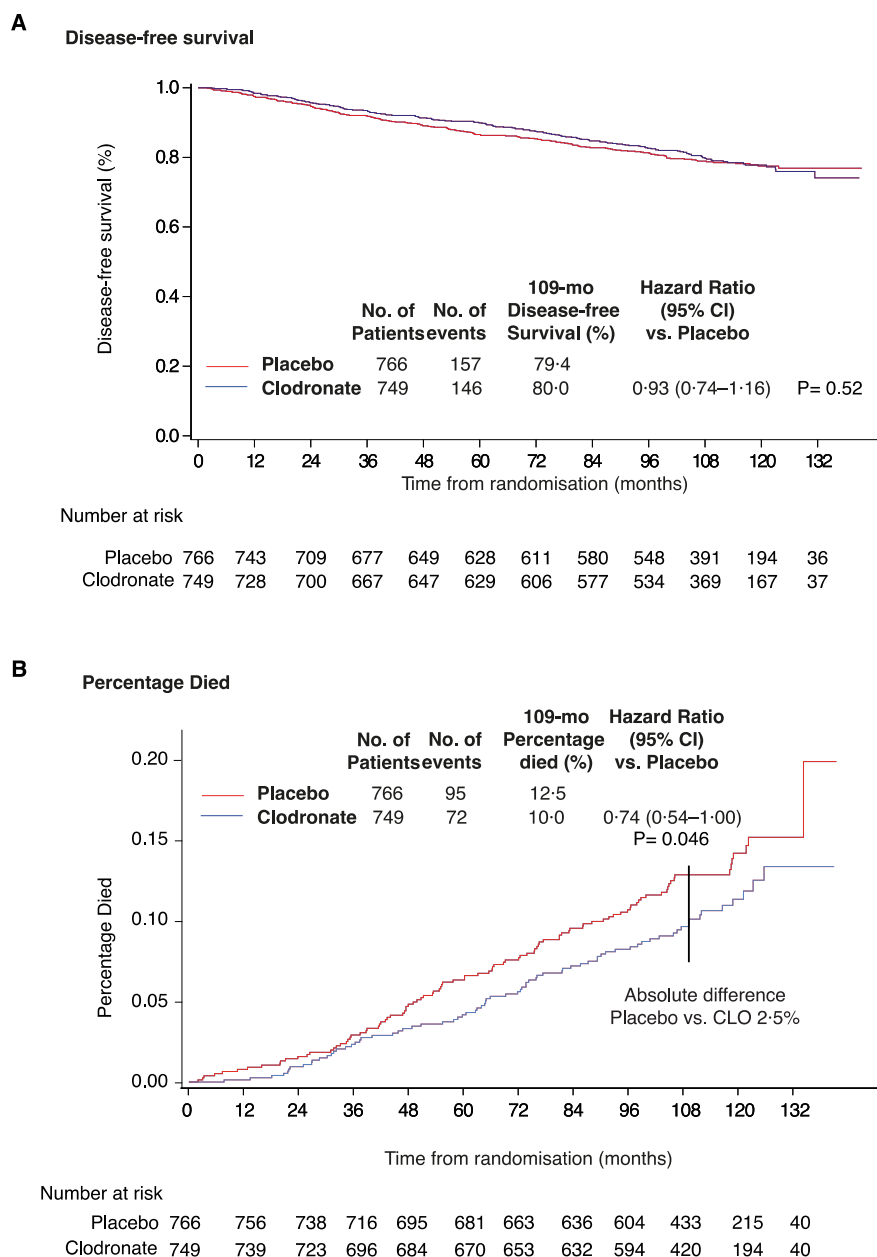

### Supplementary Figure 1. Adjuvant clodronate outcomes according to MAF stratification A)

Disease-free survival and B) Percentage died by treatment group in *MAF*-non-amplified patients at complete follow-up from Cox multivariable model adjusted for differences in age; nodal status; presence of ER/PgR; histological grade; and pathological tumor size. HR=hazard ratio, CI=Confidence Interval.

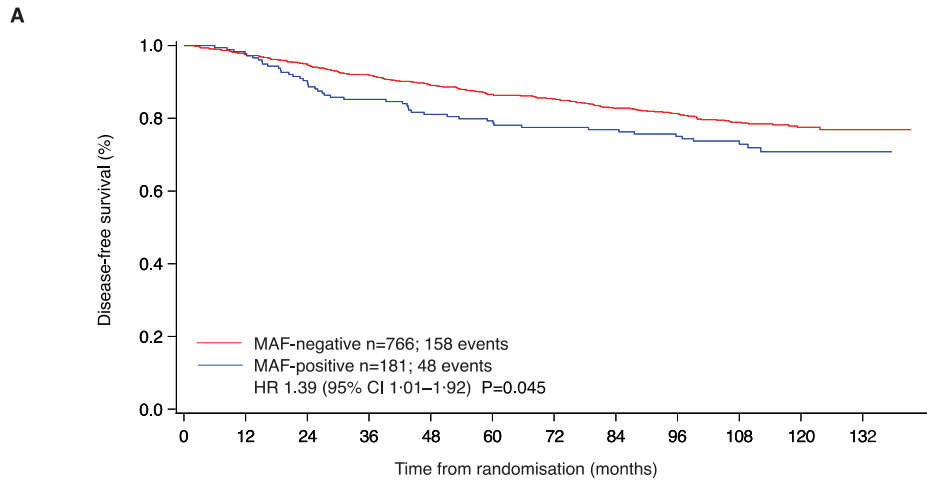

Number at risk  
(number censored)

|              |     |     |     |     |     |     |     |     |     |     |     |    |
|--------------|-----|-----|-----|-----|-----|-----|-----|-----|-----|-----|-----|----|
| MAF-negative | 766 | 743 | 709 | 677 | 649 | 628 | 611 | 580 | 548 | 391 | 194 | 36 |
| MAF-positive | 181 | 174 | 157 | 145 | 137 | 133 | 129 | 127 | 118 | 83  | 36  | 6  |

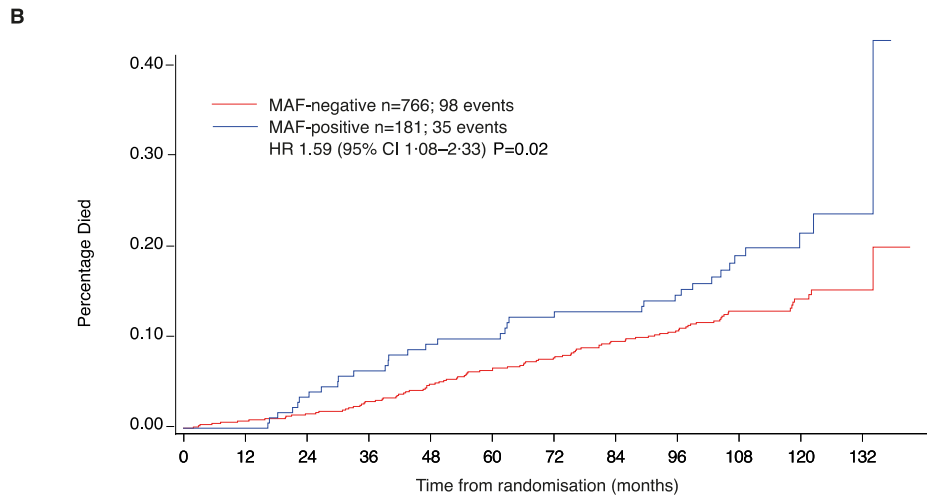

Number at risk  
(number censored)

|              |     |     |     |     |     |     |     |     |     |     |     |    |
|--------------|-----|-----|-----|-----|-----|-----|-----|-----|-----|-----|-----|----|
| MAF-negative | 766 | 756 | 738 | 716 | 695 | 681 | 663 | 636 | 604 | 433 | 215 | 40 |
| MAF-positive | 181 | 178 | 169 | 160 | 154 | 152 | 147 | 145 | 136 | 97  | 48  | 8  |

**Supplementary Figure 2. MAF amplification prognostic capacity.** A) Disease-free survival and B) Percentage died by *MAF* status in placebo treated patients Output at complete follow up from Cox multivariable model. HR=hazard ratio, CI=Confidence Interval
